# Supplementary material for: Saliva molecular testing bypassing RNA extraction is suitable for monitoring and diagnosing SARS-CoV-2 infection in children
Source: PLoS One. 2022 Jun 15;17(6):e0268388. doi: 10.1371/journal.pone.0268388 (PMC9200166; doi:10.1371/journal.pone.0268388)
Supplement: S1 File — (XLSX) [file pone.0268388.s003.xlsx]

## Sheet: Children
Sample (E)	Group (0-SWAB-;SWAB+)	Age at saliva collection (years)	Sex	COVID symptoms	Diagnostic	Comorbidity	Fever	Cough	dyspnoea	coryza	odynophagia	Anosmia	Ageustia	cephalalgia	myalgia	Abdominal pain	Nausea/vomit	diarrhoea	CT SWAB1	CT SWAB2	Days SWAB-Saliva	Days saliva collection-processing	Diluted in TBE	Mean Ct SWB	Mean CT Saliva RNA extraction	Mean CT Saliva No extraction	RNA extraction N1	RNA extraction N2	RNA extraction RNAseP	No extraction N1	No extraction N2	No extraction RNAseP
E005	1	0	M	1	Nasofaringite aguda					1									16.9	17.2	1	1	1	17.05	33.8135	not done	33.309	34.318	24.2574
E007	1	0	M	0	Pielonefrite Aguda por E. coli														30.2	31	1	0	1	30.6	25.2049	26.7626	25.0484	25.3613	26.7881	26.0155	27.5098	27.0565
E010	1	9	M	1	Crise de asma agudizada	Asma	0	1	1	0	0	0	0	0	0	0	0	0			1	0	0	N.A.	31.555	33.624	31.284	31.826	23.305	33.265	33.983	25.143
E012	1	0	M	1	PNA	0	1	1	0	1	0	0	0	0	0	0	0	0			1	1	1	N.A.	24.6944	26.4273	24.825	24.5639	25.7722	26.1412	26.7134	25.6135
E013	1	0	M	0	PNA em RN	0	0	0	0	0	0	0	0	0	0	0	0	0			1	0	1	N.A.	21.8596	27.3913	21.8134	21.9059	26.1594	26.9476	27.8351	28.5004
E015	1	5	M	0	Torção testiculo	0	0	0	0	0	0	0	0	0	0	0	0	0	33.8	36.4	0	0	0	35.1	34.4764	36.0131	33.94	35.0127	23.8976	35.6642	36.3621	24.5293
E016	1	0	M	1	Pneumonia viral	RN	0	1	1	1	0	0	0	0	0	0	0	0	20.05	19.69	1	1	1	19.87	24.0427	24.8722	23.8732	24.2122	27.287	24.6372	25.1073	27.8821
E018	1	4	F	0	Neuroblastoma	0													21.1	21.06	1	0	0	21.08	NEGATIVE	NEGATIVE	Undetermined	Undetermined	24.7219	Undetermined	Undetermined	26.5649
E019	1	0	F	0	PNA	0	0	0	0	0	0	0	0	0	0	0	0	0	14.8	15.1	2	1	0	14.95	24.1592	25.398	23.4839	24.8346	27.1631	24.8831	25.913	27.4898
E020	1	5	F	1	Febre em doente transplantada	Transplante cardíaco	1	0	0	0	1	0	0	0	0	0	0	0	18.41	18.49	0	1	0	18.45	22.4971	24.189	22.3355	22.6587	25.9465	23.6087	24.7693	27.8395
E021	1	1	M	1	COVID19	0	1	0	0	0	0	0	0	0	0	1	1	1	18.62	18.33	1	0	0	18.475	25.1567	27.7099	25.0397	25.2737	25.0894	27.4758	27.9441	26.5827
E028	1	3	F	0	Infecção urinária	;ielomeningocelo	0	0	0	0	0	0	0	0	0	0	0	0	16.56	16.61	2	1	1	16.585	23.7968	27.0026	23.4704	24.1231	24.8447	26.1599	27.8454	26.4772
E030	1	2	M	0	Valvulopatia mitral	Valvulopatia mitral	0	0	0	0	0	0	0	0	0	0	0	0	15.31	14.5	2	1	0	14.905	17.3902	19.0212	17.1327	17.6477	22.5363	18.7806	19.2618	24.4176
E032	1	8	M	0	Apendicite com peritonite generalizada	0	0	0	0	0	0	0	0	0	0	0	0	0	24		1	4	1	24	27.2415	29.3875	27.244	27.239	23.952	29.062	29.713	25.888
E035	1	8	M	0	Apendicite	0	0	0	0	0	0	0	0	0	0	0	0	0	23		0	1	0	23	25.863	27.7975	25.442	26.284	24.208	27.525	28.07	25.455
E036	1	4	M	0	Colite hemorrágica por salmonella	0	0	0	0	0	0	0	0	0	0	0	0	0	24		1	1	1	24	23.3575	25.58	23.132	23.583	24.069	24.968	26.192	26.334
E037	1	0	F	1	COVID19 em recem nascido	0	1	0	0	0	0	0	0	0	0	0	0	0	21.6	21.5	1	1	1	21.55	20.885	23.409	20.724	21.046	25.05	22.405	24.413	25.582
E039	1	0	F	1	COVID19 em pequeno latente + coinfecção adenovirus	0	1	1	0	1	0	0	0	0	0	0	0	0	21.32	21.39	1	1	0	21.355	29.194	30.137	27.435	30.953	28.867	28.975	31.299	27.439
E042	1	0	M	1	Bronquiolite	0	0	0	1	1	0	0	0	0	0	0	0	0	23.87	23.81	1	2	0	23.84	NEGATIVE	NEGATIVE	Undetermined	Undetermined	28.5203	Undetermined	Undetermined	32.2196
E043	1	8	F	1	Parésia VI par + Edema papila		1	0	0	0	0	0	0	0	0	0	1	0			2	1	0	N.A.	29.2427	33.4149	28.9508	29.5346	24.2111	32.1476	34.6822	25.9328
E044	1	8	M	1	Osteomielite MSSA		1	0	0	0	0	0	0	0	0	0	0	0	35	35	1	1	0	35	NEGATIVE	NEGATIVE	Undetermined	Undetermined	26.5982	Undetermined	Undetermined	28.5093
E047	1	0	F	1	covid	0	1	0	0	0	0	0	0	0	0	0	0	0	22.26	22.78	1	1	0	22.52	24.8998	26.3876	26.4503	23.3493	23.997	27.551	25.2241	26.674
E049	1	0	M	1	Infecção urinária	0	1	0	0	0	0	0	0	0	0	0	0	0	19.9	19.64	2	0	0	19.77	19.5141	21.0439	19.6365	19.3916	24.8769	21.0808	21.007	26.4142
E050	1	2	M	1	Pneumonia bacteriana	0	1	1	0	0	0	0	0	0	0	0	0	0	28.16	28.97	0	1	1	28.565	25.6852	28.0876	25.6446	25.7257	25.0167	27.7783	28.397	28.7737
E053	0	5	M	Control	Fenda palatina - operatório	fenda palatina															2	0	0	NEGATIVE	NEGATIVE	NEGATIVE	Undetermined	Undetermined	22.695	Undetermined	Undetermined	24.6215
E054	1	1	M	1	covid	0	1	1	0	1	0	0	0	0	0	0	0	0	37.1	35.2	2	2	0	36.15	NEGATIVE	NEGATIVE	Undetermined	Undetermined	28.3665	Undetermined	Undetermined	28.6959
E056	0	6	F	Control	Encefalite autoimune anti NMDAr	Pos encefalite herpética															2	0	0	NEGATIVE	NEGATIVE	NEGATIVE	Undetermined	Undetermined	28.723	Undetermined	Undetermined	30.7751
E057	0	5	M	Control	Frenulotomia	0															2	1	0	NEGATIVE	NEGATIVE	NEGATIVE	Undetermined	Undetermined	26.7877	Undetermined	Undetermined	30.0843
E060	1	2	M	0	Pancreatite litiasica		0	0	0	0	0	0	0	0	0	0	0	0	31.53	33.09	0	1	0	32.31	34.6562	not done	34.3654	34.947	25.1299
E061	0	1	F	Control	Atresia coanas	0															1	0	0	NEGATIVE	NEGATIVE	NEGATIVE	Undetermined	Undetermined	24.9679	Undetermined	Undetermined	27.0588
E062	1	0	F	1	COVID19	0	1	1	0	1	0	0	0	0	0	0	0	1	18.93	18.4	1	0	0	18.665	20.9747	22.8916	21.063	20.8865	27.5946	22.2653	23.5179	27.8958
E065	0	1	M	Control	restabelecimento de transito intestinal	mal formação anorectal															2	3	0	NEGATIVE	NEGATIVE	NEGATIVE	Undetermined	Undetermined	25.3337	Undetermined	Undetermined	27.546
E067	0	7	F	Control	Alongamento de tendão de aquiles																2	3	0	NEGATIVE	NEGATIVE	NEGATIVE	Undetermined	Undetermined	23.5506	Undetermined	Undetermined	28.1083
E069	1	0	F	0	Infecção esternal	T21; cardiopatia congénita grave													33.16	35.98	1	1	0	34.57	NEGATIVE	NEGATIVE	Undetermined	Undetermined	29.787	Undetermined	Undetermined	30.8393
E070	1	9	M	0	Fratura rádio																1	1	1	N.A.	36.0067	NEGATIVE	36.2516	35.7618	23.8401	Undetermined	Undetermined	25.1508
E072	0	2	M	Control	Quisto dermóide																1	2	0	NEGATIVE	NEGATIVE	NEGATIVE	Undetermined	Undetermined	27.1957	Undetermined	Undetermined	29.8189
E076	0	8	F	Control	Febre prolongada de etiologia a esclarecer	0															1	0	0	NEGATIVE	NEGATIVE	NEGATIVE	Undetermined	Undetermined	24.4206	Undetermined	Undetermined	25.29
E077	0	9	F	Control	celecistectomia	esferocitose hereditária															1	1	0	NEGATIVE	NEGATIVE	NEGATIVE	Undetermined	Undetermined	23.1493	Undetermined	Undetermined	24.8728
E079	0	1	F	Control	Queimadura	0															2	0	0	NEGATIVE	NEGATIVE	NEGATIVE	Undetermined	Undetermined	25.03	Undetermined	Undetermined	26.7921
E080	0	7	M	Control	Febre sem foco	0															2	0	0	NEGATIVE	NEGATIVE	NEGATIVE	Undetermined	Undetermined	24.7524	Undetermined	Undetermined	23.7313
E081	1	0	M	0	ITU	0													27.72	26.68	2	1	1	27.2	28.111	30.296	27.8	28.422	28.974	29.732	30.86	30.751
E083	0	1	M	Control	hidrocelo	0															1	2	0	NEGATIVE	NEGATIVE	NEGATIVE	Undetermined	Undetermined	26.589	Undetermined	Undetermined	27.618
E084	0	1	M	Control	RVU esquerdo associado a divertículo para-ureteral	0															1	2	0	NEGATIVE	NEGATIVE	NEGATIVE	Undetermined	Undetermined	28.742	Undetermined	Undetermined	30.149
E086	0	0	M	Control	remoçao de stent ureteral	0															2	1	0	NEGATIVE	NEGATIVE	NEGATIVE	Undetermined	Undetermined	27.594	Undetermined	Undetermined	26.464
E089	1	5	F	0	Artrite séptica	0													30.1	31.2	1	0	1	30.65	30.566	33.038	30.985	30.147	25.126	33.123	32.953	25.722
E090	1	4	F	0	Pre cateterismo cardiaco	Cardiopatica congénita													30.5	30.8	2	0	0	30.65	26.518	29.355	26.573	26.463	25.927	28.696	30.014	30.635
E091	1	0	M	1	COVID19	0	1	0	0	1	0	0	0	0	0	0	0	0	19	19	1	0	0	19	NEGATIVE	NEGATIVE	Undetermined	Undetermined	25.983	Undetermined	Undetermined	28.533
E092	1	7	M	0	Apendicite aguda gangrenada	0															1	0	0	N.A.	29.3505	32.289	29.628	29.073	29.229	32.414	32.164	31.738
E095	1	0	M	1	Cardiopatia congénita operada + COVID19	Cardiopatica congénita	0	1	0	1	0	0	0	0	0	0	0	0	33.06	34.3	2	1	1	33.68	27.986	28.347	27.457	28.515	26.877	27.029	29.665	28.501
E097	0	6	F	Control	Anemia carencial grave	VIH															2	3	0	NEGATIVE	NEGATIVE	NEGATIVE	Undetermined	Undetermined	23.948	Undetermined	Undetermined	26.831
E099	0	3	F	Control	Tumor dermóide frontal para-coronal mediano	0															2	1	0	NEGATIVE	NEGATIVE	NEGATIVE	Undetermined	Undetermined	28.268	Undetermined	Undetermined	31.015
E100	0	0	M	Control	Queimadura	0															2	1	0	NEGATIVE	NEGATIVE	NEGATIVE	Undetermined	Undetermined	25.855	Undetermined	Undetermined	27.971
E101	1	6	F	1	Meningoencefalite viral	0	1	0	0	0	0	0	0	0	0	0	1	0	22.29	22.53	0	3	0	22.41	29.5889	32.451	29.6455	29.5323	27.6431	32.3838	32.5182	29.928
E105*	1	0	F	1	Pneumonia COVID19	0	1	1	1	1	0	0	0	0	0	0	0	0	19.32	19.5	1	1	0	19.41	24.2746	26.0555	23.9709	24.5783	27.3668	25.7738	26.3371	29.7991
E106*	1	8	M	1	Pneumonia COVID19	Obesidade	1	1	1	0	1	0	0	1	0	0	0	0	30.33	31.8	1	1	1	31.065	32.0325	34.5447	31.7531	32.3119	26.6871	33.6145	35.4749	28.4685
E108	1	8	F	1	COVID-19, Situação social	0	1	0	0	0	0	0	0	0	0	0	0	0	24.52	24.86	1	1	1	24.69	NEGATIVE	NEGATIVE	Undetermined	Undetermined	24.0139	Undetermined	Undetermined	26.4769
E109	0	2	M	Control	correcção cirúrgica hipospádias coronal + criptorquidia esq	0															1	0	0	NEGATIVE	NEGATIVE	NEGATIVE	Undetermined	Undetermined	27.8584	Undetermined	Undetermined	28.9177
E110	0	1	F	Control	hérnia diafragmática esquerda tipo Bochdalek	0															1	0	0	NEGATIVE	NEGATIVE	NEGATIVE	Undetermined	Undetermined	27.2666	Undetermined	Undetermined	28.479
E113	0	3	F	Control	Luxação displásica das ancas bilateral	0															1	0	0	NEGATIVE	NEGATIVE	NEGATIVE	Undetermined	Undetermined	24.299	Undetermined	Undetermined	22.801
E115	1	8	M	1	Cetoacidose diabática	0	1	0	0	0	1	0	0	0	0	0	0	0	30.8	28.4	2	2	0	29.6	38.1285	36.9235	39.446	36.811	24.427	38.273	35.574	25.558
E116	0	8	F	Control	Cirurgia estomatologica	0															2	1	0	NEGATIVE	NEGATIVE	NEGATIVE	Undetermined	Undetermined	22.65	Undetermined	Undetermined	24.218
E118	1	0	F	1	Adenofleimão cervical	0	1	0	0	0	1	0	0	0	0	0	0	0	15.53	15.57	1	1	1	15.55	14.0805	17.868	14.083	14.078	23.747	18.035	17.701	25.358
E126	0	3	M	Control	Celulite periorbitária	0															1	1	1	NEGATIVE	NEGATIVE	NEGATIVE	Undetermined	Undetermined	24.987	Undetermined	Undetermined	25.691
E129	0	1	F	Control	Queimadura	0															2	3	0	NEGATIVE	NEGATIVE	NEGATIVE	Undetermined	Undetermined	27.9899	Undetermined	Undetermined	28.4696
E131	0	3	M	Control	Biopsia hepática	Elevação persistente de transaminases															2	3	0	NEGATIVE	NEGATIVE	NEGATIVE	Undetermined	Undetermined	25.165	Undetermined	Undetermined	26.1285
E132	0	6	F	Control	Cirurgia estomatológica	0															2	3	0	NEGATIVE	NEGATIVE	NEGATIVE	Undetermined	Undetermined	22.9599	Undetermined	Undetermined	24.7927
E135	0	9	F	Control	Cirurgia ORL	Papilomatose laringea															2	1	0	NEGATIVE	NEGATIVE	NEGATIVE	Undetermined	Undetermined	30.0837	Undetermined	Undetermined	29.6246
E140	1	1	F	1	Epilepsia inaugural?	0	1	0	0	0	0	0	0	0	0	0	0	0	31.11	32.13	1	2	1	31.62	36.759	31.977	38.037	35.481	23.919	31.977		23.969
E141	0	0	M	Control	Correção de malformação urinária	Status pos correção de megaureter obstrutivo															1	2	0	NEGATIVE	NEGATIVE	NEGATIVE	Undetermined	Undetermined	24.535	Undetermined	Undetermined	29.9092
E142	0	0	M	Control	Tenotomia percutanea do t.Aquiles bilateral.	Pe quinovaro															1	2	0	NEGATIVE	NEGATIVE	NEGATIVE	Undetermined	Undetermined	22.942	Undetermined	Undetermined	23.772
E143	0	0	F	Control	Artrografia anca esquerda + Tenotomia do longo adutor e do psoas	Displasia da anca															1	2	0	NEGATIVE	NEGATIVE	NEGATIVE	Undetermined	Undetermined	22.593	Undetermined	Undetermined	23.157
E144	0	6	F	Control	Cirurgia plástica	fenda palatina															2	3	0	NEGATIVE	NEGATIVE	NEGATIVE	Undetermined	Undetermined	24.2569	Undetermined	Undetermined	25.5135
E148	0	6	M	Control	Suspensoplastia com fita PDS com alça acromio-colo do peronio ombro esquerdo	Falencia de reconstrução do umero proximal esquerdo															1	3	0	NEGATIVE	NEGATIVE	NEGATIVE	Undetermined	Undetermined	23.191	Undetermined	Undetermined	25.391
E153	0	2	M	Control	Pielopastia	displasia multiquistica no rim direito															1	3	0	NEGATIVE	NEGATIVE	NEGATIVE	Undetermined	Undetermined	27.721	Undetermined	Undetermined	30.269
E157	0	7	F	Control	Colecistectomia	Litiase vesicular															1	0	0	NEGATIVE	NEGATIVE	NEGATIVE	Undetermined	Undetermined	26.566	Undetermined	Undetermined	24.5608
E160	0	7	F	Control	Papilomatose laringea	0															2	3	0	NEGATIVE	NEGATIVE	NEGATIVE	Undetermined	Undetermined	24.728	Undetermined	Undetermined	25.8002
E161	0	8	F	Control	Apendicetomia	0															1	2	1	NEGATIVE	NEGATIVE	NEGATIVE	Undetermined	Undetermined	22.4879	Undetermined	Undetermined	23.9709
E167	0	8	F	Control	Procedimento dentário	0															2	2	0	NEGATIVE	NEGATIVE	NEGATIVE	Undetermined	Undetermined	24.6664	Undetermined	Undetermined	28.4913
E171	0	7	M	Control	Apendicectomia	0															2	2	0	NEGATIVE	NEGATIVE	NEGATIVE	Undetermined	Undetermined	25.9525	Undetermined	Undetermined	28.2163
E172	0	1	M	Control	Pieloplastia	Refluxo vesico uretral															2	2	0	NEGATIVE	NEGATIVE	NEGATIVE	Undetermined	Undetermined	23.1048	Undetermined	Undetermined	24.8943
E175	0	10	M	Control																	2	0	0	NEGATIVE	NEGATIVE	NEGATIVE	Undetermined	Undetermined	24.9769	Undetermined	Undetermined	26.2819
E180	1	0	M	1	Suspeita de sépsis	0	1	1		1									21.5	22	2	0	0	21.75	24.4029	27.0577	24.2245	24.5813	25.4395	26.9784	27.1371	26.487
E183	1	0	F	1	COVID19	0	1	1		1								1	13.83	13.97	2	1	0	13.9	26.269	28.8657	26.0785	26.4595	28.56	28.5542	29.1773	25.0208
E184	1	0	F	1	COVID19	0	1	1		1									16.5	16.99	1	1	1	16.745	26.463	28.0406	26.4027	26.5233	25.1876	27.8964	28.1849	24.7356
E186	1	0	M	1	Trombocitopénia	0													18.71	18.95	1	1	1	18.83	22.2469	23.986	22.0706	22.4231	25.8771	23.5776	24.3944	23.2386

## Sheet: Adults
Sample	Group (0-SWAB-;SWAB+)	Age (years)	Sex	CT SWAB1	CT SWAB2	Days SWAB-Saliva	Days saliva collection-processing	Diluted in TBE	Mean Ct SWB	Mean CT Saliva RNA extraction	Mean CT Saliva No extraction	RNA extraction N1	RNA extraction N2	RNA extraction RNAseP	No extraction N1	No extraction N2	No extraction RNAseP
1a	1	53	F			1	2	0		30.1048	32.2042	29.2481	30.9614	24.0126	31.3939	33.0146	25.9757
2a	0		F				1	0		25.1567	27.7099	25.0397	25.2737	20.2596	27.4758	27.9441	23.6524
3a	0	34	M				3	0		NEGATIVE	NEGATIVE	Undetermined	Undetermined	25.6192	Undetermined	Undetermined	24.3889
4a	1	71	M			0	1	0		32.4044	37.6211	32.6574	32.1515	24.6626	40.337	34.9052	26.9569
5a	0	44	F				2	0		NEGATIVE	NEGATIVE	Undetermined	Undetermined	24.4868	Undetermined	Undetermined	26.6948
6a	0	27	F				2	0		NEGATIVE	NEGATIVE	Undetermined	Undetermined	25.3695	Undetermined	Undetermined	27.3377
7a	1	70	M			2	3	1		31.9489	33.4822	31.292	32.6059	23.1342	33.4822	33.4822	24.6673
8a	0					0	1	0		NEGATIVE	NEGATIVE	Undetermined	Undetermined	23.9851	Undetermined	Undetermined	25.5522
9a	1	69	M	24.88	24.05	0	1	1	24.465	23.8264	23.7529	23.746	23.9068	25.1332	23.523	23.9828	24.9318
10a	1	66	M	24.49	24.03	0	3	1		22.3489	24.7778	22.5378	22.16	24.0311	24.489	25.0665	25.8326
11a	1	72	F	19.3	18.5	1	3	1		20.5721	22.7521	20.5308	20.6134	22.4365	22.6003	22.904	23.6706
12a	1	57	M	.	.	1	3	0		26.7142	30.0569	26.4583	26.9701	20.8239	29.7842	30.3297	23.2147
13a	1	76	M	.	.	1	3	0		22.255	24.4118	22.4593	22.0507	24.5387	24.4109	24.4126	26.4945
14a	1	58	M	22.54	22.8	0	3	0		30.2759	NOT DONE	30.3921	30.1597	23.5242
15a	1	31	F	25.7	27.68	0	3	0		33.0572	34.0856	33.0921	33.0224	24.9259	34.1398	34.0313	26.2257
16a	1	92	F	14	15	3	1	1	14.5	20.86	23.617	21.052	20.668	22.079	23.98	23.254	22.309
17a	1	67	F	28.7	26.3	0	2	1	27.5	33.926	32.7995	34.109	33.743	23.807	32.74	32.859	23.072
18a	1	93	F	18.23	18.07	0	1	0	18.15	28.505	28.822	28.073	28.937	25.948	27.719	29.925	23.653
19a	1	78	M	28.67	27.68	0	2	1	28.175	25.5385	27.8875	25.164	25.913	21.772	27.821	27.954	23.998
20a	1	87	F	19.9	18.1	0	1	1	19	23.8651	26.4013	23.7246	24.0055	23.586	25.8572	26.9453	25.293
21a	1	66	M	36.15	.	0	2	1	36.15	31.054	33.1377	30.9734	31.1346	23.9619	34.3756	31.8999	24.7738
22a	1	55	M	22.66	22.41	0	2	1	22.535	29.6148	32.6498	29.8714	29.3582	22.5216	32.6627	32.6368	23.0546
23a	1						1	0		28.133	30.0078	28.3775	27.8884	25.4604	29.8408	30.1748	27.2654
24a	1	57	M	20.56	19.63	0	2	1	20.095	32.033	34.1625	32.172	31.894	22.11	34.884	33.441	23.995
25a	1	78	F	31.25	32.72	0	1	1		19.6027	23.7083	19.2279	19.9774	21.3184	23.098	24.3185	23.0946
26a	1	86	F	35.05		0	1	1		33.5174	NOT DONE	33.1768	33.858	23.3245
21	1								20.36	21.8749	24.26	21.9293	21.8205	27.9016	24.5929	23.9271	30.0252
22	1								28.56	23.0975	23.9851	23.3418	22.8532	23.5876	23.9299	24.0404	25.4634
23	1								19.46	18.5547	19.0158	18.2668	18.8427	23.8378	19.0862	18.9455	24.5914
24	1								23.94	21.9942	22.8188	22.0105	21.978	23.399	22.7851	22.8526	24.6648
25	1								21.96	24.1659	25.5251	23.9062	24.4255	24.3457	25.4754	25.5748	26.3646
32	1								22.07	25.9617	28.7099	26.1489	25.7746	24.2827	28.8447	28.5752	25.9723
33	1								19.18	21.2913	20.9307	21.5038	21.0788	22.541	20.2839	21.5775	23.9886
34	1								22.23	19.8603	22.809	19.7005	20.0201	20.8797	22.5039	23.114	24.6524
35	1								21.51	17.4767	18.4679	17.2918	17.6615	23.0009	17.9476	18.9882	23.6938
36	1								23.96	27.9477	29.665	27.9676	27.9277	26.286	29.6626	29.6674	27.8026
37	1								25.88	24.4536	26.0979	24.3448	24.5625	24.713	25.6232	26.5725	24.8025
38	1								20.72	23.7796	25.7778	23.8639	23.6953	23.7293	25.4985	26.0571	24.3502
39	1								23.6	20.7066	22.6104	20.4855	20.9276	23.6914	22.5964	22.6244	24.8003
40	1								20.97	14.2135	15.9089	14.2234	14.2036	23.0558	15.722	16.0957	24.6549
41	1								21.55	17.8664	19.3588	17.7638	17.969	24.2311	19.169	19.5486	25.1953
c23	0										NEGATIVE	Undetermined	Undetermined	25.4889	Undetermined	Undetermined	27.5524
c26	0										NEGATIVE	Undetermined	Undetermined	24.5481	Undetermined	Undetermined	25.9708
c31	0										NEGATIVE	40.0462	Undetermined	23.0092	Undetermined	Undetermined	26.3021
c40	0										NEGATIVE	Undetermined	Undetermined	22.8164	Undetermined	Undetermined	23.9009
c52	0										NEGATIVE	Undetermined	Undetermined	26.83	Undetermined	Undetermined	26.3478
c55	0										NEGATIVE	Undetermined	Undetermined	25.5252	Undetermined	Undetermined	22.9469
c60	0										NEGATIVE	Undetermined	Undetermined	24.6204	Undetermined	Undetermined	24.5239
c63	0										NEGATIVE	Undetermined	Undetermined	22.958	Undetermined	Undetermined	21.9747

## Sheet: Stability
		With RNA extraction														Without RNA extraction
		Immediate processing			3d at 4ºC			7d at -20ºC								Immediate processing			3d at 4ºC			7d at -20ºC
		2019 nCoV_N1	2019 nCoV_N2	RNase P	2019 nCoV_N1	2019 nCoV_N2	RNase P	2019 nCoV_N1	2019 nCoV_N2	RNase P		IMMEDIATE	3d at 4ºC	7d at -20ºC		2019 nCoV_N1	2019 nCoV_N2	RNase P	2019 nCoV_N1	2019 nCoV_N2	RNase P	2019 nCoV_N1	2019 nCoV_N2	RNase P		IMMEDIATE	3d at 4ºC	7d at -20ºC
Adults	2	26.3597	26.106	30.9111	26.6188	26.187	33.7799	28.631	29.751	28.6142		26.2328	26.4029	29.191		28.6793	29.9143	32.6338	28.5698	29.1883	35.7921	29.765		32.9224		29.2968	28.879	29.765
	6	24.353	24.6788	22.8539	26.3023	26.605	26.1273	27.375	27.239	22.823		24.5159	26.4536	27.307		28.5863	29.9928	26.9398	28.1419	29.8162	28.8634	29.812	34.156	27.3832		29.2895	28.9791	31.984
	7	21.4929	21.0587	25.6253	22.0394	21.4742	26.9484	22.984	21.166	26.857		21.2758	21.7568	22.075		23.7235	25.2371	28.1368	24.0532	26.1855	29.0472	24.7678	33.5673	28.8389		24.4803	25.1194	29.1676
	9	28.0846	27.7364	30.0777	28.2753	27.9298	32.8834	30.884	29.66	33.451		27.9105	28.1025	30.272		31.4476	32.1015	32.5953	30.8019	32.879	35.4977	33.2768	35.1205	36.6612		31.7746	31.8404	34.1986
	10	27.2556	27.6569	20.1356	27.0989	27.1002	22.3065	29.6595	28.9234	20.449		27.4562	27.0996	29.2915		31.4583	33.1782	24.3783	32.5449	33.0415	26.7816	34.211	40.67	24.3151		32.3183	32.7932	37.4405
	11	33.4097	35.3017	24.3022	34.0155	34.1034	29.0072	34.7126	34.9836	25.8373		34.3557	34.0595	34.8481
	12	25.6809	25.7217	28.5241	26.733	26.2213	32.1229	27.8715	26.4737	31.5325		25.7013	26.4772	27.1726		28.8142	32.7755	32.7621	29.9037	32.2482	35.6398	30.404	32.754	34.399		30.7949	31.0759	31.579
Children	19E	23.4839	24.8346	27.1631	22.7904	23.4084	25.7956	22.178	22.9254	26.1606		24.1592	23.0994	22.5517
	20E	22.3355	22.6587	25.9465	22.0025	22.2129	26.609	21.7295	22.094	26.0678		22.4971	22.1077	21.9118		23.6087	24.7693	27.8395	24.5568	25.6762	27.8408	24.8831	25.7523	29.2269		24.189	25.1165	25.3177
	118E	14.083	14.078	23.747	14.8789	15.2092	24.1883	14.6141	14.9277	24.2123		14.0805	15.044	14.7709
	180E	24.2245	24.5813	25.4395	24.9057	25.274	24.9966	24.1146	24.1853	24.7528		24.4029	25.0899	24.15		26.9784	27.1371	26.487	26.0951	26.6252	25.8728	25.9314	26.75	25.1625		27.0577	26.3601	26.3407
	181E	27.5882	27.9912	24.8209	27.9902	29.3846	25.7947	26.0993	26.4798	22.782		27.7897	28.6874	26.2895		27.3276	28.3521	26.0866	33.0557	33.9634	25.7664	27.8048	28.949	24.9654		27.8399	33.5095	28.3769
	10E	31.284	31.826	23.305	31.2521	32.3651	23.3331	30.6307	32.9083	24.1334		31.555	31.8086	31.7695		33.265	33.983	25.143	34.6369	33.9466	26.2171	34.0537	34.9433	25.9704		33.624	34.2917	34.4985
	30E	17.1327	17.6477	22.5363	15.9207	16.9057	22.4794	15.5117	16.9691	22.915		17.3902	16.4132	16.2404		18.7806	19.2618	24.4176	18.8336	20.3963	25.1922	18.067	19.3047	24.6125		19.0212	19.615	18.6859
	43E	28.9508	29.5346	24.2111	28.9476	29.9008	24.441	29.4935	30.9224	24.0841		29.2427	29.4242	30.2079		32.1476	34.6822	25.9328		35.9965	26.4059	31.9827	33.8112	26.0229		33.4149	35.9965	32.897
	90E	26.573	26.463	25.927	25.8929	26.9874	24.3254	25.5091	26.3889	23.8498		26.518	26.4402	25.949		28.696	30.014	30.635	28.9792	30.1651	25.4729	28.9566	30.1456	25.5917		29.355	29.5722	29.5511
	95E	27.457	28.515	26.877	27.3971	28.1761	27.4606	27.5971	28.7131	27.1042		27.986	27.7866	28.1551		27.029	29.665	28.501	29.8497	31.3513	27.973	30.2601	32.0126	28.0509		28.347	30.6005	31.1364
	111E	20.25	20.06	24.046	20.316	21.3958	25.103	19.6191	20.7518	24.2165		20.155	20.8559	20.1854		23.302	23.26	25.656	23.9646	24.4803	25.7149	21.9963	23.0888	26.9883		23.281	24.2225	22.5425
	187E	25.5659	26.0662	24.9321	25.5764	26.3654	26.0096	25.1296	26.1382	25.5572		25.8161	25.9709	25.6339		27.2732	28.9008	25.5749	28.2115	30.1335	28.8396	28.0623	29.2831	29.0985		28.087	29.1725	28.6727
	188E	28.7162	29.7796	25.4906	28.7834	29.7818	26.2923	27.5839	28.9421	25.8781		29.2479	29.2826	28.263		31.1404	32.3533	26.9542	31.693	32.4383	26.8489	31.9348	33.5044	26.9655		31.7469	32.0656	32.7196

## Sheet: ELISA
sampleid	group	age	swabpos	salpcrpos	igg_spk	iga_spk	igm_spk	igg_rbd	iga_rbd	igm_rbd	igg_spk_neg3sd	iga_spk_neg3sd	igm_spk_neg3sd	igg_rbd_neg3sd	iga_rbd_neg3sd	igm_rbd_neg3sd	igg_spk_neg2sd	iga_spk_neg2sd	igm_spk_neg2sd	igg_rbd_neg2sd	iga_rbd_neg2sd	igm_rbd_neg2sd	igg_spk_3ngml	iga_spk_3ngml	igm_spk_3ngml	igg_rbd_3ngml	iga_rbd_3ngml	igm_rbd_3ngml	igg_spk_6ngml	iga_spk_6ngml	igm_spk_6ngml	igg_rbd_6ngml	iga_rbd_6ngml	igm_rbd_6ngml	posneg_igg_spk_neg3sd	posneg_iga_spk_neg3sd	posneg_igm_spk_neg3sd	posneg_igg_rbd_neg3sd	posneg_iga_rbd_neg3sd	posneg_igm_rbd_neg3sd	posneg_igg_spk_neg2sd	posneg_iga_spk_neg2sd	posneg_igm_spk_neg2sd	posneg_igg_rbd_neg2sd	posneg_iga_rbd_neg2sd	posneg_igm_rbd_neg2sd	posneg_igg_spk_3ngml	posneg_iga_spk_3ngml	posneg_igm_spk_3ngml
F001	Adults	53	1	1	0.2417	1.14885	0.38165	0.20655	1.2351	0.4316	0.453739	0.175162	0.350245	0.455909	0.279071	0.485398	0.437193	0.175091	0.342113	0.419139	0.268748	0.468215	0.53225	0.47595	0.5882	0.2781	0.27825	0.29105	0.78665	0.68955	0.8361	0.44295	0.41225	0.5067	0	1	1	0	1	0	0	1	1	0	1	0	0	1	0
F003	Adults	34	0	0	0.4324	0.8652	0.1602	0.3296	1.1102	0.2556	0.453739	0.175162	0.350245	0.455909	0.279071	0.485398	0.437193	0.175091	0.342113	0.419139	0.268748	0.468215	0.53225	0.47595	0.5882	0.2781	0.27825	0.29105	0.78665	0.68955	0.8361	0.44295	0.41225	0.5067	0	1	0	0	1	0	0	1	0	0	1	0	0	1	0
F004	Adults	71	1	1	0.11755	0.82775	0.20125	0.1133	1.20825	0.2753	0.453739	0.175162	0.350245	0.455909	0.279071	0.485398	0.437193	0.175091	0.342113	0.419139	0.268748	0.468215	0.53225	0.47595	0.5882	0.2781	0.27825	0.29105	0.78665	0.68955	0.8361	0.44295	0.41225	0.5067	0	1	0	0	1	0	0	1	0	0	1	0	0	1	0
F005	Adults	44	0	0	0.27255	0.6827	0.1885	0.26885	0.7543	0.3059	0.453739	0.175162	0.350245	0.455909	0.279071	0.485398	0.437193	0.175091	0.342113	0.419139	0.268748	0.468215	0.53225	0.47595	0.5882	0.2781	0.27825	0.29105	0.78665	0.68955	0.8361	0.44295	0.41225	0.5067	0	1	0	0	1	0	0	1	0	0	1	0	0	1	0
F006	Adults	27	0	0	0.08335	0.11945	0.09185	0.07205	0.1206	0.08405	0.589761	0.197576	0.485059	0.30377	0.156408	0.356946	0.548607	0.193051	0.445956	0.29083	0.150822	0.336864	0.31165	0.23455	0.46515	0.18855	0.18995	0.4714	0.52315	0.4116	0.81605	0.3241	0.35505	0.76915	0	0	0	0	0	0	0	0	0	0	0	0	0	0	0
F008	Adults		0	0	0.19125	1.2845	0.1294	0.23275	1.37655	0.16895	0.589761	0.197576	0.485059	0.30377	0.156408	0.356946	0.548607	0.193051	0.445956	0.29083	0.150822	0.336864	0.31165	0.23455	0.46515	0.18855	0.18995	0.4714	0.52315	0.4116	0.81605	0.3241	0.35505	0.76915	0	1	0	0	1	0	0	1	0	0	1	0	0	1	0
F009	Adults	69	1	1	0.09265	0.1995	0.10755	0.08495	0.1559	0.0922	0.589761	0.197576	0.485059	0.30377	0.156408	0.356946	0.548607	0.193051	0.445956	0.29083	0.150822	0.336864	0.31165	0.23455	0.46515	0.18855	0.18995	0.4714	0.52315	0.4116	0.81605	0.3241	0.35505	0.76915	0	1	0	0	0	0	0	1	0	0	1	0	0	0	0
F010	Adults	66	1	1	0.0872	0.40505	0.22755	0.0878	0.3429	0.23025	0.589761	0.197576	0.485059	0.30377	0.156408	0.356946	0.548607	0.193051	0.445956	0.29083	0.150822	0.336864	0.31165	0.23455	0.46515	0.18855	0.18995	0.4714	0.52315	0.4116	0.81605	0.3241	0.35505	0.76915	0	1	0	0	1	0	0	1	0	0	1	0	0	1	0
F011	Adults	72	1	1	0.0983	0.43925	0.15285	0.10235	0.62915	0.1774	0.623571	0.2474	0.638407	0.550635	0.274494	0.693071	0.605964	0.240116	0.579788	0.542856	0.266079	0.663514	0.43445	0.2804	0.52765	0.35185	0.32465	0.7328	0.703	0.5037	0.8809	0.58485	0.59595	1.05945	0	1	0	0	1	0	0	1	0	0	1	0	0	1	0
F012	Adults	57	1	1	0.0993	0.29345	0.09535	0.09165	0.2184	0.0951	0.589761	0.197576	0.485059	0.30377	0.156408	0.356946	0.548607	0.193051	0.445956	0.29083	0.150822	0.336864	0.31165	0.23455	0.46515	0.18855	0.18995	0.4714	0.52315	0.4116	0.81605	0.3241	0.35505	0.76915	0	1	0	0	1	0	0	1	0	0	1	0	0	1	0
F013	Adults	76	1	1	0.14125	0.53075	0.39165	0.14875	0.46415	0.38235	0.589761	0.197576	0.485059	0.30377	0.156408	0.356946	0.548607	0.193051	0.445956	0.29083	0.150822	0.336864	0.31165	0.23455	0.46515	0.18855	0.18995	0.4714	0.52315	0.4116	0.81605	0.3241	0.35505	0.76915	0	1	0	0	1	1	0	1	0	0	1	1	0	1	0
F014	Adults	58	1	1	0.097	0.29335	0.1322	0.10865	0.25945	0.11005	0.589761	0.197576	0.485059	0.30377	0.156408	0.356946	0.548607	0.193051	0.445956	0.29083	0.150822	0.336864	0.31165	0.23455	0.46515	0.18855	0.18995	0.4714	0.52315	0.4116	0.81605	0.3241	0.35505	0.76915	0	1	0	0	1	0	0	1	0	0	1	0	0	1	0
F015	Adults	31	1	1	0.09015	0.18595	0.0937	0.08185	0.1514	0.07375	0.589761	0.197576	0.485059	0.30377	0.156408	0.356946	0.548607	0.193051	0.445956	0.29083	0.150822	0.336864	0.31165	0.23455	0.46515	0.18855	0.18995	0.4714	0.52315	0.4116	0.81605	0.3241	0.35505	0.76915	0	0	0	0	0	0	0	0	0	0	1	0	0	0	0
F016	Adults	92	1	1	0.10975	0.32575	0.10695	0.09	0.2445	0.10225	0.589761	0.197576	0.485059	0.30377	0.156408	0.356946	0.548607	0.193051	0.445956	0.29083	0.150822	0.336864	0.31165	0.23455	0.46515	0.18855	0.18995	0.4714	0.52315	0.4116	0.81605	0.3241	0.35505	0.76915	0	1	0	0	1	0	0	1	0	0	1	0	0	1	0
F018	Adults	93	1	1	0.11855	0.1292	0.14625	0.0711	0.1459	0.16085	0.623571	0.2474	0.638407	0.550635	0.274494	0.693071	0.605964	0.240116	0.579788	0.542856	0.266079	0.663514	0.43445	0.2804	0.52765	0.35185	0.32465	0.7328	0.703	0.5037	0.8809	0.58485	0.59595	1.05945	0	0	0	0	0	0	0	0	0	0	0	0	0	0	0
F019	Adults	78	1	1	0.12625	0.4197	0.1317	0.13325	0.49225	0.1493	0.369557	0.193703	0.461859	0.462332	0.21178	0.621393	0.351738	0.175035	0.415472	0.403571	0.19587	0.559945	0.3279	0.18285	0.46815	0.2266	0.19065	0.42515	0.5847	0.30255	0.81415	0.4148	0.3428	0.7095	0	1	0	0	1	0	0	1	0	0	1	0	0	1	0
F021	Adults	66	1	1	0.0798	0.1113	0.0727	0.08265	0.12885	0.10175	0.369557	0.193703	0.461859	0.462332	0.21178	0.621393	0.351738	0.175035	0.415472	0.403571	0.19587	0.559945	0.3279	0.18285	0.46815	0.2266	0.19065	0.42515	0.5847	0.30255	0.81415	0.4148	0.3428	0.7095	0	0	0	0	0	0	0	0	0	0	0	0	0	0	0
F022	Adults	55	1	1	0.129	0.6093	0.13755	0.13385	0.78975	0.16045	0.369557	0.193703	0.461859	0.462332	0.21178	0.621393	0.351738	0.175035	0.415472	0.403571	0.19587	0.559945	0.3279	0.18285	0.46815	0.2266	0.19065	0.42515	0.5847	0.30255	0.81415	0.4148	0.3428	0.7095	0	1	0	0	1	0	0	1	0	0	1	0	0	1	0
F023	Adults		1	1	0.0761	0.14625	0.07755	0.11385	0.1144	0.0904	0.369557	0.193703	0.461859	0.462332	0.21178	0.621393	0.351738	0.175035	0.415472	0.403571	0.19587	0.559945	0.3279	0.18285	0.46815	0.2266	0.19065	0.42515	0.5847	0.30255	0.81415	0.4148	0.3428	0.7095	0	0	0	0	0	0	0	0	0	0	0	0	0	0	0
F024	Adults	57	1	1	0.0842	0.4776	0.20715	0.0928	0.59975	0.2317	0.369557	0.193703	0.461859	0.462332	0.21178	0.621393	0.351738	0.175035	0.415472	0.403571	0.19587	0.559945	0.3279	0.18285	0.46815	0.2266	0.19065	0.42515	0.5847	0.30255	0.81415	0.4148	0.3428	0.7095	0	1	0	0	1	0	0	1	0	0	1	0	0	1	0
F027	Adults	43	0	0	0.28835	0.1709	0.10715	0.15075	0.1661	0.12935	0.369557	0.193703	0.461859	0.462332	0.21178	0.621393	0.351738	0.175035	0.415472	0.403571	0.19587	0.559945	0.3279	0.18285	0.46815	0.2266	0.19065	0.42515	0.5847	0.30255	0.81415	0.4148	0.3428	0.7095	0	0	0	0	0	0	0	0	0	0	0	0	0	0	0
E100	Children	0	0	0	0.15015	0.4142	0.13645	0.1622	0.3455	0.13195	0.589761	0.197576	0.485059	0.30377	0.156408	0.356946	0.548607	0.193051	0.445956	0.29083	0.150822	0.336864	0.31165	0.23455	0.46515	0.18855	0.18995	0.4714	0.52315	0.4116	0.81605	0.3241	0.35505	0.76915	0	1	0	0	1	0	0	1	0	0	1	0	0	1	0
E047	Children	0	1	1	0.1246	0.0936	0.0955	0.09485	0.10825	0.1083	0.453739	0.175162	0.350245	0.455909	0.279071	0.485398	0.437193	0.175091	0.342113	0.419139	0.268748	0.468215	0.53225	0.47595	0.5882	0.2781	0.27825	0.29105	0.78665	0.68955	0.8361	0.44295	0.41225	0.5067	0	0	0	0	0	0	0	0	0	0	0	0	0	0	0
E095	Children	0	1	1	0.16305	0.23305	0.1205	0.25985	0.18255	0.121	0.589761	0.197576	0.485059	0.30377	0.156408	0.356946	0.548607	0.193051	0.445956	0.29083	0.150822	0.336864	0.31165	0.23455	0.46515	0.18855	0.18995	0.4714	0.52315	0.4116	0.81605	0.3241	0.35505	0.76915	0	1	0	0	1	0	0	1	0	0	1	0	0	0	0
E081	Children	0	1	1	0.08975	0.10735	0.09125	0.14	0.1	0.101	0.523613	0.328165	0.578218	0.765506	0.279255	0.718	0.490025	0.31671	0.562378	0.708937	0.268153	0.639	0.3929	0.2492	0.49555	0.40515	0.3502	0.57255	0.62905	0.405	0.83175	0.6161	0.4907	0.86575	0	0	0	0	0	0	0	0	0	0	0	0	0	0	0
E042	Children	0	1	0	0.08005	0.10395	0.096	0.06925	0.13305	0.10335	0.453739	0.175162	0.350245	0.455909	0.279071	0.485398	0.437193	0.175091	0.342113	0.419139	0.268748	0.468215	0.53225	0.47595	0.5882	0.2781	0.27825	0.29105	0.78665	0.68955	0.8361	0.44295	0.41225	0.5067	0	0	0	0	0	0	0	0	0	0	0	0	0	0	0
E091	Children	0	1	0	0.26815	0.71515	0.6082	0.31285	0.71495	0.47245	0.523613	0.328165	0.578218	0.765506	0.279255	0.718	0.490025	0.31671	0.562378	0.708937	0.268153	0.639	0.3929	0.2492	0.49555	0.40515	0.3502	0.57255	0.62905	0.405	0.83175	0.6161	0.4907	0.86575	0	1	1	0	1	0	0	1	1	0	1	0	0	1	1
E142	Children	0	0	0	0.09465	0.27585	0.1797	0.0926	0.33625	0.2292	0.623571	0.2474	0.638407	0.550635	0.274494	0.693071	0.605964	0.240116	0.579788	0.542856	0.266079	0.663514	0.43445	0.2804	0.52765	0.35185	0.32465	0.7328	0.703	0.5037	0.8809	0.58485	0.59595	1.05945	0	1	0	0	1	0	0	1	0	0	1	0	0	0	0
E007	Children	0	1	1	0.17345	0.38525	0.19495	0.1406	0.51675	0.2546	0.453739	0.175162	0.350245	0.455909	0.279071	0.485398	0.437193	0.175091	0.342113	0.419139	0.268748	0.468215	0.53225	0.47595	0.5882	0.2781	0.27825	0.29105	0.78665	0.68955	0.8361	0.44295	0.41225	0.5067	0	1	0	0	1	0	0	1	0	0	1	0	0	0	0
E019	Children	0	1	1	0.10865	0.1755	0.0995	0.11515	0.29775	0.0961	0.373293	0.173331	0.677639	0.51062	0.429858	0.527636	0.369545	0.169654	0.598726	0.46883	0.356955	0.472057	0.5825	0.2861	0.3683	0.37685	0.22575	0.2801	0.8914	0.46155	0.60625	0.60925	0.37065	0.46385	0	1	0	0	0	0	0	1	0	0	0	0	0	0	0
E141	Children	0	0	0	0.0697	0.0778	0.1002	0.0832	0.0882	0.11275	0.623571	0.2474	0.638407	0.550635	0.274494	0.693071	0.605964	0.240116	0.579788	0.542856	0.266079	0.663514	0.43445	0.2804	0.52765	0.35185	0.32465	0.7328	0.703	0.5037	0.8809	0.58485	0.59595	1.05945	0	0	0	0	0	0	0	0	0	0	0	0	0	0	0
E069	Children	0	1	0	0.09955	0.1912	0.20445	0.18425	0.19855	0.15725	0.523613	0.328165	0.578218	0.765506	0.279255	0.718	0.490025	0.31671	0.562378	0.708937	0.268153	0.639	0.3929	0.2492	0.49555	0.40515	0.3502	0.57255	0.62905	0.405	0.83175	0.6161	0.4907	0.86575	0	0	0	0	0	0	0	0	0	0	0	0	0	0	0
E086	Children	0	0	0	0.1683	1.5195	0.48675	0.19625	1.6214	0.31165	0.523613	0.328165	0.578218	0.765506	0.279255	0.718	0.490025	0.31671	0.562378	0.708937	0.268153	0.639	0.3929	0.2492	0.49555	0.40515	0.3502	0.57255	0.62905	0.405	0.83175	0.6161	0.4907	0.86575	0	1	0	0	1	0	0	1	0	0	1	0	0	1	0
E041	Children	0	1	0	0.1321	0.4245	0.604	0.0765	0.38405	0.48675	0.453739	0.175162	0.350245	0.455909	0.279071	0.485398	0.437193	0.175091	0.342113	0.419139	0.268748	0.468215	0.53225	0.47595	0.5882	0.2781	0.27825	0.29105	0.78665	0.68955	0.8361	0.44295	0.41225	0.5067	0	1	1	0	1	1	0	1	1	0	1	1	0	0	1
E118	Children	0	1	1	0.119	0.08455	0.0786	0.0908	0.10755	0.08385	0.589761	0.197576	0.485059	0.30377	0.156408	0.356946	0.548607	0.193051	0.445956	0.29083	0.150822	0.336864	0.31165	0.23455	0.46515	0.18855	0.18995	0.4714	0.52315	0.4116	0.81605	0.3241	0.35505	0.76915	0	0	0	0	0	0	0	0	0	0	0	0	0	0	0
E021	Children	0	1	1	0.10355	0.1154	0.139	0.11285	0.19895	0.1455	0.373293	0.173331	0.677639	0.51062	0.429858	0.527636	0.369545	0.169654	0.598726	0.46883	0.356955	0.472057	0.5825	0.2861	0.3683	0.37685	0.22575	0.2801	0.8914	0.46155	0.60625	0.60925	0.37065	0.46385	0	0	0	0	0	0	0	0	0	0	0	0	0	0	0
E110	Children	1	0	0	0.09295	0.1538	0.21355	0.09205	0.2809	0.22715	0.623571	0.2474	0.638407	0.550635	0.274494	0.693071	0.605964	0.240116	0.579788	0.542856	0.266079	0.663514	0.43445	0.2804	0.52765	0.35185	0.32465	0.7328	0.703	0.5037	0.8809	0.58485	0.59595	1.05945	0	0	0	0	1	0	0	0	0	0	1	0	0	0	0
E051	Children	1	1	0	0.1409	0.48785	1.2447	0.20485	0.50575	0.64185	0.523613	0.328165	0.578218	0.765506	0.279255	0.718	0.490025	0.31671	0.562378	0.708937	0.268153	0.639	0.3929	0.2492	0.49555	0.40515	0.3502	0.57255	0.62905	0.405	0.83175	0.6161	0.4907	0.86575	0	1	1	0	1	0	0	1	1	0	1	1	0	1	1
E054	Children	1	1	0	0.11375	0.2075	0.1965	0.18365	0.1661	0.14595	0.523613	0.328165	0.578218	0.765506	0.279255	0.718	0.490025	0.31671	0.562378	0.708937	0.268153	0.639	0.3929	0.2492	0.49555	0.40515	0.3502	0.57255	0.62905	0.405	0.83175	0.6161	0.4907	0.86575	0	0	0	0	0	0	0	0	0	0	0	0	0	0	0
E061	Children	1	0	0	0.15755	0.15395	0.3096	0.10105	0.2083	0.3224	0.623571	0.2474	0.638407	0.550635	0.274494	0.693071	0.605964	0.240116	0.579788	0.542856	0.266079	0.663514	0.43445	0.2804	0.52765	0.35185	0.32465	0.7328	0.703	0.5037	0.8809	0.58485	0.59595	1.05945	0	0	0	0	0	0	0	0	0	0	0	0	0	0	0
E079	Children	1	0	0	0.1166	0.4372	0.3347	0.2156	0.5095	0.241	0.523613	0.328165	0.578218	0.765506	0.279255	0.718	0.490025	0.31671	0.562378	0.708937	0.268153	0.639	0.3929	0.2492	0.49555	0.40515	0.3502	0.57255	0.62905	0.405	0.83175	0.6161	0.4907	0.86575	0	1	0	0	1	0	0	1	0	0	1	0	0	1	0
E083	Children	1	0	0	0.11805	0.2144	0.13015	0.0963	0.1999	0.12075	0.523613	0.328165	0.578218	0.765506	0.279255	0.718	0.490025	0.31671	0.562378	0.708937	0.268153	0.639	0.3929	0.2492	0.49555	0.40515	0.3502	0.57255	0.62905	0.405	0.83175	0.6161	0.4907	0.86575	0	0	0	0	0	0	0	0	0	0	0	0	0	0	0
E172	Children	1	0	0	0.1911	1.46305	0.11945	0.2323	1.4116	0.11645	0.381785	0.233166	0.613761	0.857	0.419848	0.773938	0.371673	0.228994	0.60379	0.778	0.412282	0.704359	0.38075	0.3422	0.6121	0.5035	0.407	0.7814	0.64135	0.55655	0.96225	0.71215	0.6702	1.2338	0	1	0	0	1	0	0	1	0	0	1	0	0	1	0
E084	Children	1	0	0	0.09235	0.13125	0.163	0.11915	0.1471	0.13335	0.523613	0.328165	0.578218	0.765506	0.279255	0.718	0.490025	0.31671	0.562378	0.708937	0.268153	0.639	0.3929	0.2492	0.49555	0.40515	0.3502	0.57255	0.62905	0.405	0.83175	0.6161	0.4907	0.86575	0	0	0	0	0	0	0	0	0	0	0	0	0	0	0
E129	Children	1	0	0	0.0981	0.12485	0.1377	0.0818	0.12225	0.1195	0.623571	0.2474	0.638407	0.550635	0.274494	0.693071	0.605964	0.240116	0.579788	0.542856	0.266079	0.663514	0.43445	0.2804	0.52765	0.35185	0.32465	0.7328	0.703	0.5037	0.8809	0.58485	0.59595	1.05945	0	0	0	0	0	0	0	0	0	0	0	0	0	0	0
E065	Children	1	0	0	0.1537	0.22945	0.18665	0.2023	0.18735	0.1649	0.523613	0.328165	0.578218	0.765506	0.279255	0.718	0.490025	0.31671	0.562378	0.708937	0.268153	0.639	0.3929	0.2492	0.49555	0.40515	0.3502	0.57255	0.62905	0.405	0.83175	0.6161	0.4907	0.86575	0	0	0	0	0	0	0	0	0	0	0	0	0	0	0
E072	Children	2	0	0	0.12535	0.2187	0.26945	0.23335	0.2089	0.20445	0.523613	0.328165	0.578218	0.765506	0.279255	0.718	0.490025	0.31671	0.562378	0.708937	0.268153	0.639	0.3929	0.2492	0.49555	0.40515	0.3502	0.57255	0.62905	0.405	0.83175	0.6161	0.4907	0.86575	0	0	0	0	0	0	0	0	0	0	0	0	0	0	0
E060	Children	2	1	1	0.10875	0.25755	0.1321	0.21295	0.2424	0.12085	0.523613	0.328165	0.578218	0.765506	0.279255	0.718	0.490025	0.31671	0.562378	0.708937	0.268153	0.639	0.3929	0.2492	0.49555	0.40515	0.3502	0.57255	0.62905	0.405	0.83175	0.6161	0.4907	0.86575	0	0	0	0	0	0	0	0	0	0	0	0	0	1	0
E153	Children	2	0	0	0.08685	0.1235	0.13175	0.09785	0.11895	0.09215	0.381785	0.233166	0.613761	0.857	0.419848	0.773938	0.371673	0.228994	0.60379	0.778	0.412282	0.704359	0.38075	0.3422	0.6121	0.5035	0.407	0.7814	0.64135	0.55655	0.96225	0.71215	0.6702	1.2338	0	0	0	0	0	0	0	0	0	0	0	0	0	0	0
E109	Children	2	0	0	0.1157	0.179	0.11365	0.11275	0.1506	0.1125	0.589761	0.197576	0.485059	0.30377	0.156408	0.356946	0.548607	0.193051	0.445956	0.29083	0.150822	0.336864	0.31165	0.23455	0.46515	0.18855	0.18995	0.4714	0.52315	0.4116	0.81605	0.3241	0.35505	0.76915	0	0	0	0	0	0	0	0	0	0	0	0	0	0	0
E094	Children	2	1	1	0.0787	0.10835	0.13245	0.14355	0.11475	0.11575	0.523613	0.328165	0.578218	0.765506	0.279255	0.718	0.490025	0.31671	0.562378	0.708937	0.268153	0.639	0.3929	0.2492	0.49555	0.40515	0.3502	0.57255	0.62905	0.405	0.83175	0.6161	0.4907	0.86575	0	0	0	0	0	0	0	0	0	0	0	0	0	0	0
E030	Children	2	1	1	0.34265	0.3336	0.1304	0.38845	0.36835	0.1161	0.373293	0.173331	0.677639	0.51062	0.429858	0.527636	0.369545	0.169654	0.598726	0.46883	0.356955	0.472057	0.5825	0.2861	0.3683	0.37685	0.22575	0.2801	0.8914	0.46155	0.60625	0.60925	0.37065	0.46385	0	1	0	0	0	0	0	1	0	0	1	0	0	1	0
E126	Children	3	0	0	0.1689	0.51325	0.16175	0.1681	0.40785	0.1539	0.589761	0.197576	0.485059	0.30377	0.156408	0.356946	0.548607	0.193051	0.445956	0.29083	0.150822	0.336864	0.31165	0.23455	0.46515	0.18855	0.18995	0.4714	0.52315	0.4116	0.81605	0.3241	0.35505	0.76915	0	1	0	0	1	0	0	1	0	0	1	0	0	1	0
E113	Children	3	0	0	0.2691	0.2018	0.1088	0.1448	0.1526	0.1053	0.589761	0.197576	0.485059	0.30377	0.156408	0.356946	0.548607	0.193051	0.445956	0.29083	0.150822	0.336864	0.31165	0.23455	0.46515	0.18855	0.18995	0.4714	0.52315	0.4116	0.81605	0.3241	0.35505	0.76915	0	1	0	0	0	0	0	1	0	0	1	0	0	0	0
E131	Children	3	0	0	0.07485	0.10005	0.09075	0.07985	0.11025	0.09855	0.623571	0.2474	0.638407	0.550635	0.274494	0.693071	0.605964	0.240116	0.579788	0.542856	0.266079	0.663514	0.43445	0.2804	0.52765	0.35185	0.32465	0.7328	0.703	0.5037	0.8809	0.58485	0.59595	1.05945	0	0	0	0	0	0	0	0	0	0	0	0	0	0	0
E099	Children	3	0	0	0.0875	0.19355	0.12095	0.0824	0.1183	0.10825	0.589761	0.197576	0.485059	0.30377	0.156408	0.356946	0.548607	0.193051	0.445956	0.29083	0.150822	0.336864	0.31165	0.23455	0.46515	0.18855	0.18995	0.4714	0.52315	0.4116	0.81605	0.3241	0.35505	0.76915	0	0	0	0	0	0	0	1	0	0	0	0	0	0	0
E090	Children	4	1	1	0.13975	0.43835	0.1604	0.16405	0.4475	0.1538	0.523613	0.328165	0.578218	0.765506	0.279255	0.718	0.490025	0.31671	0.562378	0.708937	0.268153	0.639	0.3929	0.2492	0.49555	0.40515	0.3502	0.57255	0.62905	0.405	0.83175	0.6161	0.4907	0.86575	0	1	0	0	1	0	0	1	0	0	1	0	0	1	0
E036	Children	4	1	1	0.22545	0.54435	0.1875	0.258	0.73345	0.17675	0.453739	0.175162	0.350245	0.455909	0.279071	0.485398	0.437193	0.175091	0.342113	0.419139	0.268748	0.468215	0.53225	0.47595	0.5882	0.2781	0.27825	0.29105	0.78665	0.68955	0.8361	0.44295	0.41225	0.5067	0	1	0	0	1	0	0	1	0	0	1	0	0	1	0
E018	Children	4	1	0	0.1728	0.2227	0.2833	0.1698	0.3193	0.33275	0.373293	0.173331	0.677639	0.51062	0.429858	0.527636	0.369545	0.169654	0.598726	0.46883	0.356955	0.472057	0.5825	0.2861	0.3683	0.37685	0.22575	0.2801	0.8914	0.46155	0.60625	0.60925	0.37065	0.46385	0	1	0	0	0	0	0	1	0	0	0	0	0	0	0
E020	Children	5	1	1	0.1983	0.12605	0.1025	0.23895	0.20075	0.07035	0.373293	0.173331	0.677639	0.51062	0.429858	0.527636	0.369545	0.169654	0.598726	0.46883	0.356955	0.472057	0.5825	0.2861	0.3683	0.37685	0.22575	0.2801	0.8914	0.46155	0.60625	0.60925	0.37065	0.46385	0	0	0	0	0	0	0	0	0	0	0	0	0	0	0
E089	Children	5	1	1	0.22845	0.46995	0.2535	0.2568	0.526	0.2225	0.523613	0.328165	0.578218	0.765506	0.279255	0.718	0.490025	0.31671	0.562378	0.708937	0.268153	0.639	0.3929	0.2492	0.49555	0.40515	0.3502	0.57255	0.62905	0.405	0.83175	0.6161	0.4907	0.86575	0	1	0	0	1	0	0	1	0	0	1	0	0	1	0
E057	Children	5	0	0	0.1113	0.7493	0.2196	0.21275	0.75915	0.17595	0.523613	0.328165	0.578218	0.765506	0.279255	0.718	0.490025	0.31671	0.562378	0.708937	0.268153	0.639	0.3929	0.2492	0.49555	0.40515	0.3502	0.57255	0.62905	0.405	0.83175	0.6161	0.4907	0.86575	0	1	0	0	1	0	0	1	0	0	1	0	0	1	0
E015	Children	5	1	1	0.3642	0.3658	0.29625	0.22855	0.38165	0.2938	0.373293	0.173331	0.677639	0.51062	0.429858	0.527636	0.369545	0.169654	0.598726	0.46883	0.356955	0.472057	0.5825	0.2861	0.3683	0.37685	0.22575	0.2801	0.8914	0.46155	0.60625	0.60925	0.37065	0.46385	0	1	0	0	0	0	0	1	0	0	1	0	0	1	0
E097	Children	6	0	0	0.2484	0.19825	0.13485	0.1681	0.1349	0.1153	0.589761	0.197576	0.485059	0.30377	0.156408	0.356946	0.548607	0.193051	0.445956	0.29083	0.150822	0.336864	0.31165	0.23455	0.46515	0.18855	0.18995	0.4714	0.52315	0.4116	0.81605	0.3241	0.35505	0.76915	0	1	0	0	0	0	0	1	0	0	0	0	0	0	0
E022	Children	6	2	0	0.1266	0.14375	0.1212	0.1284	0.1697	0.1793	0.373293	0.173331	0.677639	0.51062	0.429858	0.527636	0.369545	0.169654	0.598726	0.46883	0.356955	0.472057	0.5825	0.2861	0.3683	0.37685	0.22575	0.2801	0.8914	0.46155	0.60625	0.60925	0.37065	0.46385	0	0	0	0	0	0	0	0	0	0	0	0	0	0	0
E148	Children	6	0	0	0.12025	0.27015	0.25365	0.1079	0.3529	0.3262	0.623571	0.2474	0.638407	0.550635	0.274494	0.693071	0.605964	0.240116	0.579788	0.542856	0.266079	0.663514	0.43445	0.2804	0.52765	0.35185	0.32465	0.7328	0.703	0.5037	0.8809	0.58485	0.59595	1.05945	0	1	0	0	1	0	0	1	0	0	1	0	0	0	0
E056	Children	6	0	0	0.1098	0.3759	0.32685	0.2151	0.32955	0.14405	0.523613	0.328165	0.578218	0.765506	0.279255	0.718	0.490025	0.31671	0.562378	0.708937	0.268153	0.639	0.3929	0.2492	0.49555	0.40515	0.3502	0.57255	0.62905	0.405	0.83175	0.6161	0.4907	0.86575	0	1	0	0	1	0	0	1	0	0	1	0	0	1	0
E101	Children	6	1	1	0.0737	0.11805	0.08445	0.07625	0.09155	0.0743	0.589761	0.197576	0.485059	0.30377	0.156408	0.356946	0.548607	0.193051	0.445956	0.29083	0.150822	0.336864	0.31165	0.23455	0.46515	0.18855	0.18995	0.4714	0.52315	0.4116	0.81605	0.3241	0.35505	0.76915	0	0	0	0	0	0	0	0	0	0	0	0	0	0	0
E171	Children	7	0	0	0.14335	1.0503	0.1721	0.2141	1.0966	0.1437	0.381785	0.233166	0.613761	0.857	0.419848	0.773938	0.371673	0.228994	0.60379	0.778	0.412282	0.704359	0.38075	0.3422	0.6121	0.5035	0.407	0.7814	0.64135	0.55655	0.96225	0.71215	0.6702	1.2338	0	1	0	0	1	0	0	1	0	0	1	0	0	1	0
E157	Children	7	0	0	0.1353	0.30655	0.1231	0.13725	0.30645	0.15045	0.381785	0.233166	0.613761	0.857	0.419848	0.773938	0.371673	0.228994	0.60379	0.778	0.412282	0.704359	0.38075	0.3422	0.6121	0.5035	0.407	0.7814	0.64135	0.55655	0.96225	0.71215	0.6702	1.2338	0	1	0	0	0	0	0	1	0	0	0	0	0	0	0
E080	Children	7	0	0	0.2264	0.47795	0.23105	0.2825	0.46745	0.183	0.523613	0.328165	0.578218	0.765506	0.279255	0.718	0.490025	0.31671	0.562378	0.708937	0.268153	0.639	0.3929	0.2492	0.49555	0.40515	0.3502	0.57255	0.62905	0.405	0.83175	0.6161	0.4907	0.86575	0	1	0	0	1	0	0	1	0	0	1	0	0	1	0
E067	Children	7	0	0	0.20015	0.7628	0.5219	0.27635	0.7239	0.44585	0.523613	0.328165	0.578218	0.765506	0.279255	0.718	0.490025	0.31671	0.562378	0.708937	0.268153	0.639	0.3929	0.2492	0.49555	0.40515	0.3502	0.57255	0.62905	0.405	0.83175	0.6161	0.4907	0.86575	0	1	0	0	1	0	0	1	0	0	1	0	0	1	1
E108	Children	8	1	0	0.71465	0.39905	0.1431	0.1898	0.5287	0.118	0.589761	0.197576	0.485059	0.30377	0.156408	0.356946	0.548607	0.193051	0.445956	0.29083	0.150822	0.336864	0.31165	0.23455	0.46515	0.18855	0.18995	0.4714	0.52315	0.4116	0.81605	0.3241	0.35505	0.76915	1	1	0	0	1	0	1	1	0	0	1	0	1	1	0
E167	Children	8	0	0	0.09705	0.77285	0.2352	0.1227	0.81645	0.13365	0.381785	0.233166	0.613761	0.857	0.419848	0.773938	0.371673	0.228994	0.60379	0.778	0.412282	0.704359	0.38075	0.3422	0.6121	0.5035	0.407	0.7814	0.64135	0.55655	0.96225	0.71215	0.6702	1.2338	0	1	0	0	1	0	0	1	0	0	1	0	0	1	0
E106*	Children	8	1	1	0.4575	1.59155	0.403	0.43795	1.5247	0.38915	0.589761	0.197576	0.485059	0.30377	0.156408	0.356946	0.548607	0.193051	0.445956	0.29083	0.150822	0.336864	0.31165	0.23455	0.46515	0.18855	0.18995	0.4714	0.52315	0.4116	0.81605	0.3241	0.35505	0.76915	0	1	0	1	1	1	0	1	0	1	1	1	1	1	0
E032	Children	8	1	1	0.07945	0.09885	0.09565	0.1235	0.13525	0.084	0.373293	0.173331	0.677639	0.51062	0.429858	0.527636	0.369545	0.169654	0.598726	0.46883	0.356955	0.472057	0.5825	0.2861	0.3683	0.37685	0.22575	0.2801	0.8914	0.46155	0.60625	0.60925	0.37065	0.46385	0	0	0	0	0	0	0	0	0	0	0	0	0	0	0
E161	Children	8	0	0	0.40515	1.15225	0.31185	0.4451	1.1525	0.2333	0.381785	0.233166	0.613761	0.857	0.419848	0.773938	0.371673	0.228994	0.60379	0.778	0.412282	0.704359	0.38075	0.3422	0.6121	0.5035	0.407	0.7814	0.64135	0.55655	0.96225	0.71215	0.6702	1.2338	1	1	0	0	1	0	1	1	0	0	1	0	1	1	0
E115	Children	8	1	1	0.13745	0.2872	0.13755	0.10795	0.22415	0.1637	0.589761	0.197576	0.485059	0.30377	0.156408	0.356946	0.548607	0.193051	0.445956	0.29083	0.150822	0.336864	0.31165	0.23455	0.46515	0.18855	0.18995	0.4714	0.52315	0.4116	0.81605	0.3241	0.35505	0.76915	0	1	0	0	1	0	0	1	0	0	1	0	0	1	0
E076	Children	8	0	0	0.17895	0.45665	0.14025	0.25695	0.53745	0.1168	0.523613	0.328165	0.578218	0.765506	0.279255	0.718	0.490025	0.31671	0.562378	0.708937	0.268153	0.639	0.3929	0.2492	0.49555	0.40515	0.3502	0.57255	0.62905	0.405	0.83175	0.6161	0.4907	0.86575	0	1	0	0	1	0	0	1	0	0	1	0	0	1	0
E035	Children	8	1	1	0.15245	0.1864	0.10575	0.1569	0.3287	0.1123	0.453739	0.175162	0.350245	0.455909	0.279071	0.485398	0.437193	0.175091	0.342113	0.419139	0.268748	0.468215	0.53225	0.47595	0.5882	0.2781	0.27825	0.29105	0.78665	0.68955	0.8361	0.44295	0.41225	0.5067	0	1	0	0	1	0	0	1	0	0	1	0	0	0	0
E044	Children	8	1	0	0.09735	0.2138	0.1268	0.06535	0.24065	0.14785	0.453739	0.175162	0.350245	0.455909	0.279071	0.485398	0.437193	0.175091	0.342113	0.419139	0.268748	0.468215	0.53225	0.47595	0.5882	0.2781	0.27825	0.29105	0.78665	0.68955	0.8361	0.44295	0.41225	0.5067	0	1	0	0	0	0	0	1	0	0	0	0	0	0	0
E077	Children	9	0	0	0.13795	0.24735	0.1675	0.23375	0.22675	0.1512	0.523613	0.328165	0.578218	0.765506	0.279255	0.718	0.490025	0.31671	0.562378	0.708937	0.268153	0.639	0.3929	0.2492	0.49555	0.40515	0.3502	0.57255	0.62905	0.405	0.83175	0.6161	0.4907	0.86575	0	0	0	0	0	0	0	0	0	0	0	0	0	0	0
E135	Children	9	0	0	0.07285	0.12755	0.0953	0.08505	0.1376	0.09795	0.623571	0.2474	0.638407	0.550635	0.274494	0.693071	0.605964	0.240116	0.579788	0.542856	0.266079	0.663514	0.43445	0.2804	0.52765	0.35185	0.32465	0.7328	0.703	0.5037	0.8809	0.58485	0.59595	1.05945	0	0	0	0	0	0	0	0	0	0	0	0	0	0	0
E010	Children	9	1	1	0.3024	0.92415	0.43475	0.17155	0.9111	0.3268	0.373293	0.173331	0.677639	0.51062	0.429858	0.527636	0.369545	0.169654	0.598726	0.46883	0.356955	0.472057	0.5825	0.2861	0.3683	0.37685	0.22575	0.2801	0.8914	0.46155	0.60625	0.60925	0.37065	0.46385	0	1	0	0	1	0	0	1	0	0	1	0	0	1	1
E070	Children	9	1	0	0.21635	0.6666	0.2907	0.2709	0.4897	0.26085	0.523613	0.328165	0.578218	0.765506	0.279255	0.718	0.490025	0.31671	0.562378	0.708937	0.268153	0.639	0.3929	0.2492	0.49555	0.40515	0.3502	0.57255	0.62905	0.405	0.83175	0.6161	0.4907	0.86575	0	1	0	0	1	0	0	1	0	0	1	0	0	1	0
E063	Children	10	0	0	0.1384	0.30095	0.21525	0.1276	0.2312	0.14125	0.523613	0.328165	0.578218	0.765506	0.279255	0.718	0.490025	0.31671	0.562378	0.708937	0.268153	0.639	0.3929	0.2492	0.49555	0.40515	0.3502	0.57255	0.62905	0.405	0.83175	0.6161	0.4907	0.86575	0	0	0	0	0	0	0	0	0	0	0	0	0	1	0
E127	Children	10	0	0	0.1123	0.25615	0.1659	0.11805	0.2705	0.11765	0.623571	0.2474	0.638407	0.550635	0.274494	0.693071	0.605964	0.240116	0.579788	0.542856	0.266079	0.663514	0.43445	0.2804	0.52765	0.35185	0.32465	0.7328	0.703	0.5037	0.8809	0.58485	0.59595	1.05945	0	1	0	0	0	0	0	1	0	0	1	0	0	0	0
E085	Children	10	1	0	0.3402	0.52375	0.1611	0.351	0.52145	0.11925	0.523613	0.328165	0.578218	0.765506	0.279255	0.718	0.490025	0.31671	0.562378	0.708937	0.268153	0.639	0.3929	0.2492	0.49555	0.40515	0.3502	0.57255	0.62905	0.405	0.83175	0.6161	0.4907	0.86575	0	1	0	0	1	0	0	1	0	0	1	0	0	1	0
E173	Children	10	0	0	0.8826	0.74975	0.78335	0.69385	0.7914	0.51715	0.381785	0.233166	0.613761	0.857	0.419848	0.773938	0.371673	0.228994	0.60379	0.778	0.412282	0.704359	0.38075	0.3422	0.6121	0.5035	0.407	0.7814	0.64135	0.55655	0.96225	0.71215	0.6702	1.2338	1	1	1	0	1	0	1	1	1	0	1	0	1	1	1
E033	Children	10	1	1	0.073	0.10765	0.09955	0.09495	0.1394	0.07615	0.373293	0.173331	0.677639	0.51062	0.429858	0.527636	0.369545	0.169654	0.598726	0.46883	0.356955	0.472057	0.5825	0.2861	0.3683	0.37685	0.22575	0.2801	0.8914	0.46155	0.60625	0.60925	0.37065	0.46385	0	0	0	0	0	0	0	0	0	0	0	0	0	0	0
E121	Children	10	0	0	0.1084	0.17635	0.1138	0.10125	0.17355	0.09025	0.589761	0.197576	0.485059	0.30377	0.156408	0.356946	0.548607	0.193051	0.445956	0.29083	0.150822	0.336864	0.31165	0.23455	0.46515	0.18855	0.18995	0.4714	0.52315	0.4116	0.81605	0.3241	0.35505	0.76915	0	0	0	0	1	0	0	0	0	0	1	0	0	0	0
E064	Children	10	0	0	0.11805	0.2019	0.16565	0.1582	0.1576	0.13665	0.523613	0.328165	0.578218	0.765506	0.279255	0.718	0.490025	0.31671	0.562378	0.708937	0.268153	0.639	0.3929	0.2492	0.49555	0.40515	0.3502	0.57255	0.62905	0.405	0.83175	0.6161	0.4907	0.86575	0	0	0	0	0	0	0	0	0	0	0	0	0	0	0
E001	Children	10	1	0	0.1883	1.49065	0.95695	0.1616	1.466	0.6558	0.453739	0.175162	0.350245	0.455909	0.279071	0.485398	0.437193	0.175091	0.342113	0.419139	0.268748	0.468215	0.53225	0.47595	0.5882	0.2781	0.27825	0.29105	0.78665	0.68955	0.8361	0.44295	0.41225	0.5067	0	1	1	0	1	1	0	1	1	0	1	1	0	1	1
E111	Children	10	1	1	0.10705	0.22175	0.1003	0.09455	0.18	0.0909	0.589761	0.197576	0.485059	0.30377	0.156408	0.356946	0.548607	0.193051	0.445956	0.29083	0.150822	0.336864	0.31165	0.23455	0.46515	0.18855	0.18995	0.4714	0.52315	0.4116	0.81605	0.3241	0.35505	0.76915	0	1	0	0	1	0	0	1	0	0	1	0	0	0	0
E025	Children	10	1	1	0.12865	0.2224	0.16245	0.1209	0.2399	0.1716	0.373293	0.173331	0.677639	0.51062	0.429858	0.527636	0.369545	0.169654	0.598726	0.46883	0.356955	0.472057	0.5825	0.2861	0.3683	0.37685	0.22575	0.2801	0.8914	0.46155	0.60625	0.60925	0.37065	0.46385	0	1	0	0	0	0	0	1	0	0	0	0	0	0	0
[truncated: 9 more columns]
